# Supplementary material
Source: PubMed Central journal article supplement (PMC6842413)

**A**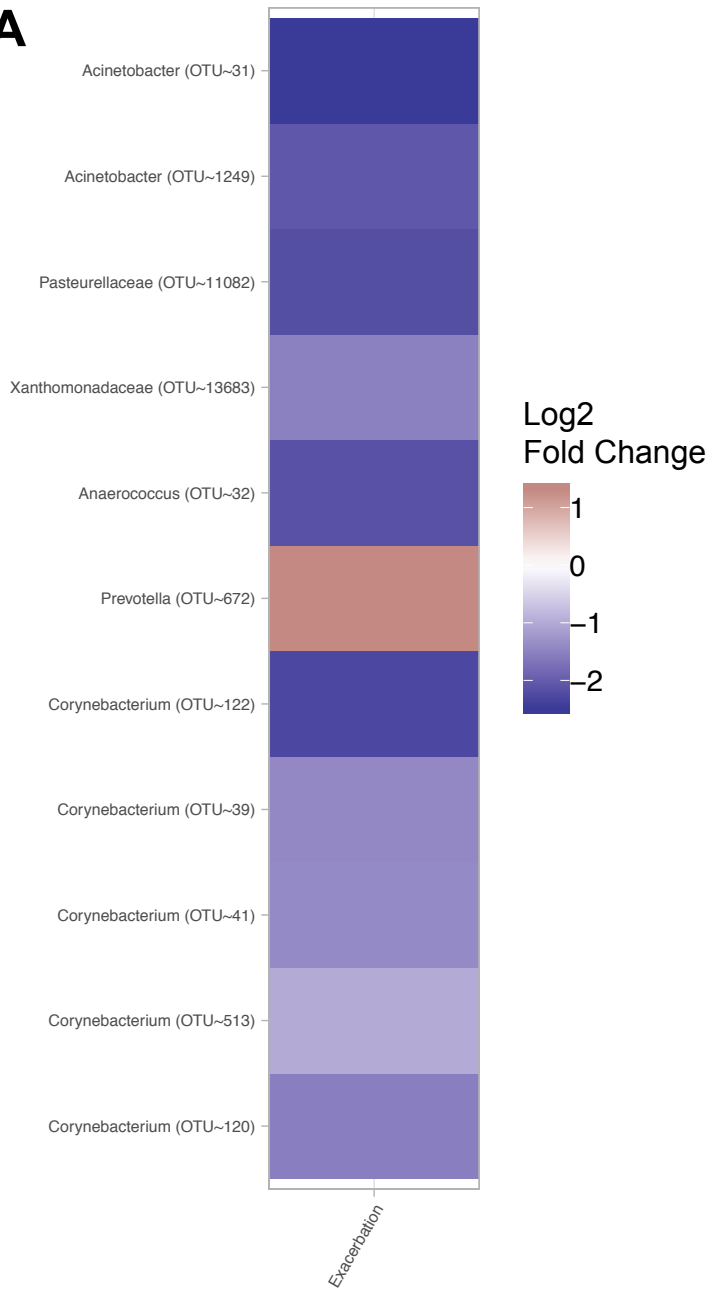**B**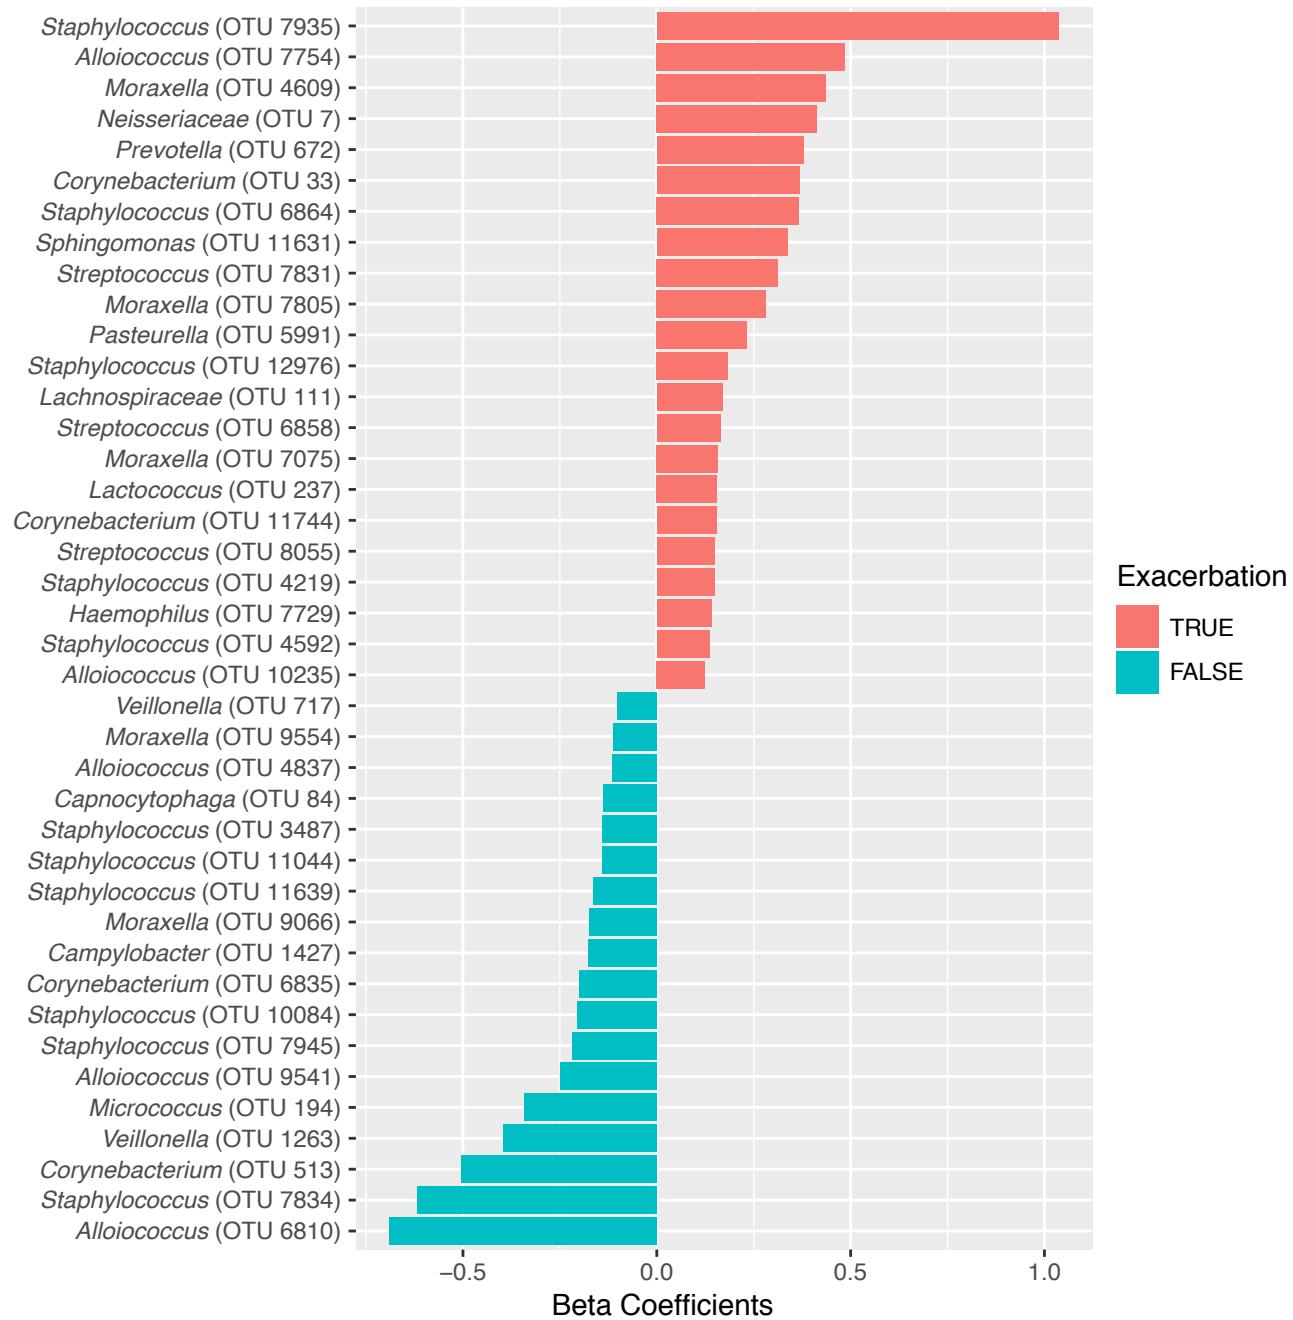

Supplement: NIHMS1052077-supplement-FigureE1.pdf [file NIHMS1052077-supplement-FigureE1.pdf]

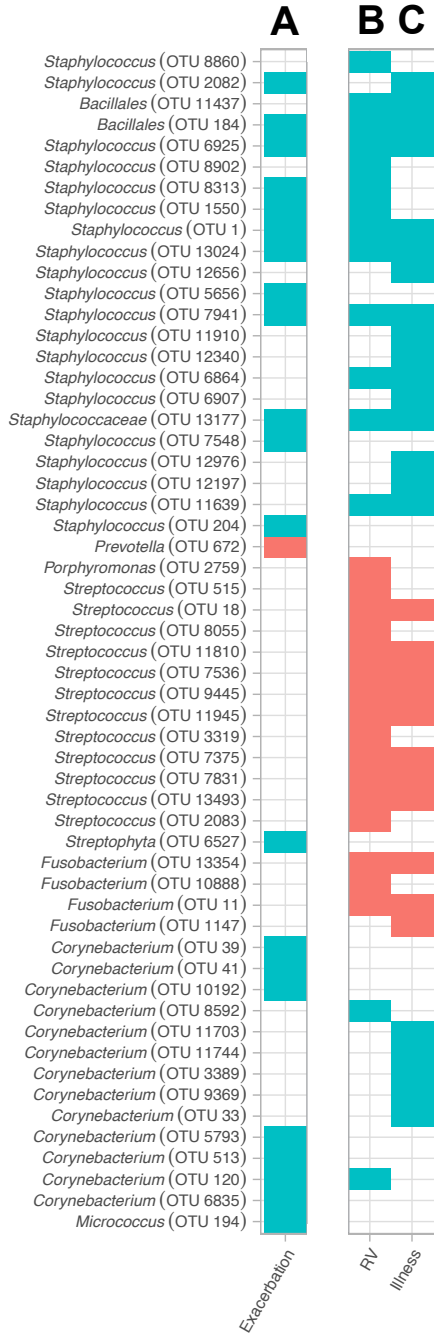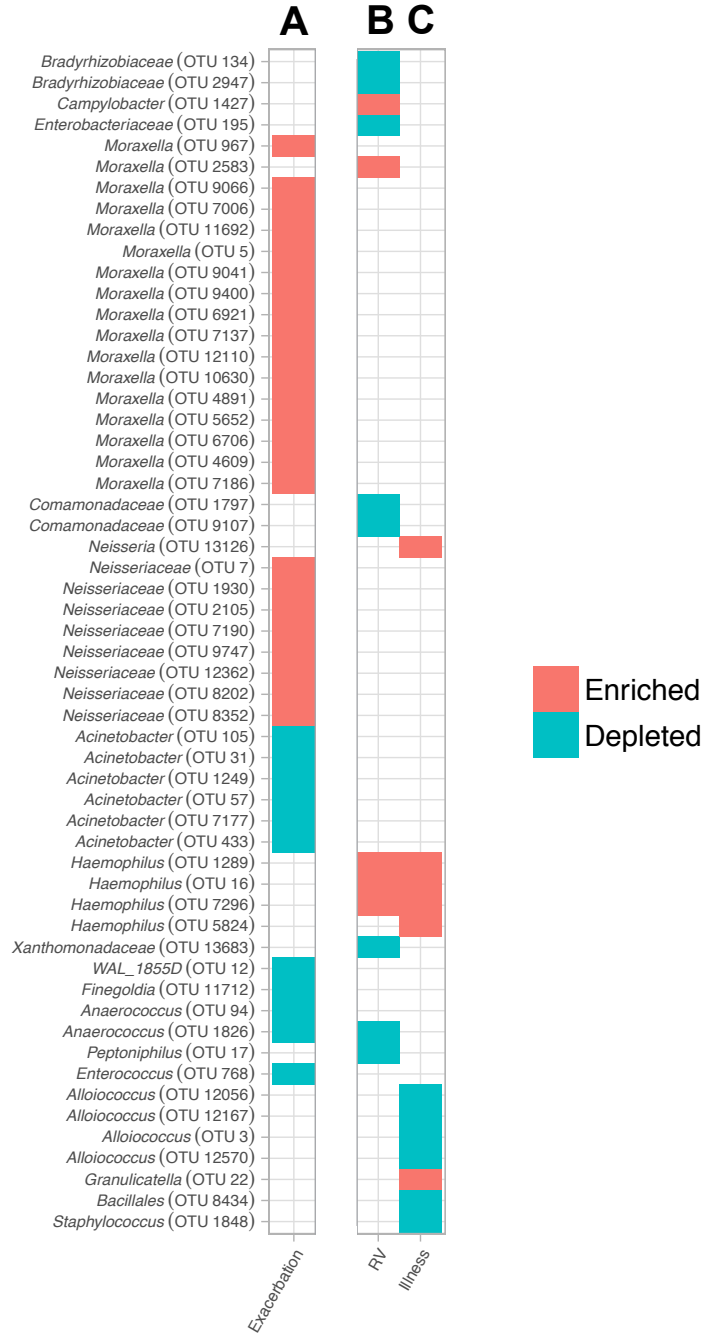

Supplement: NIHMS1052077-supplement-FigureE2.pdf [file NIHMS1052077-supplement-FigureE2.pdf]

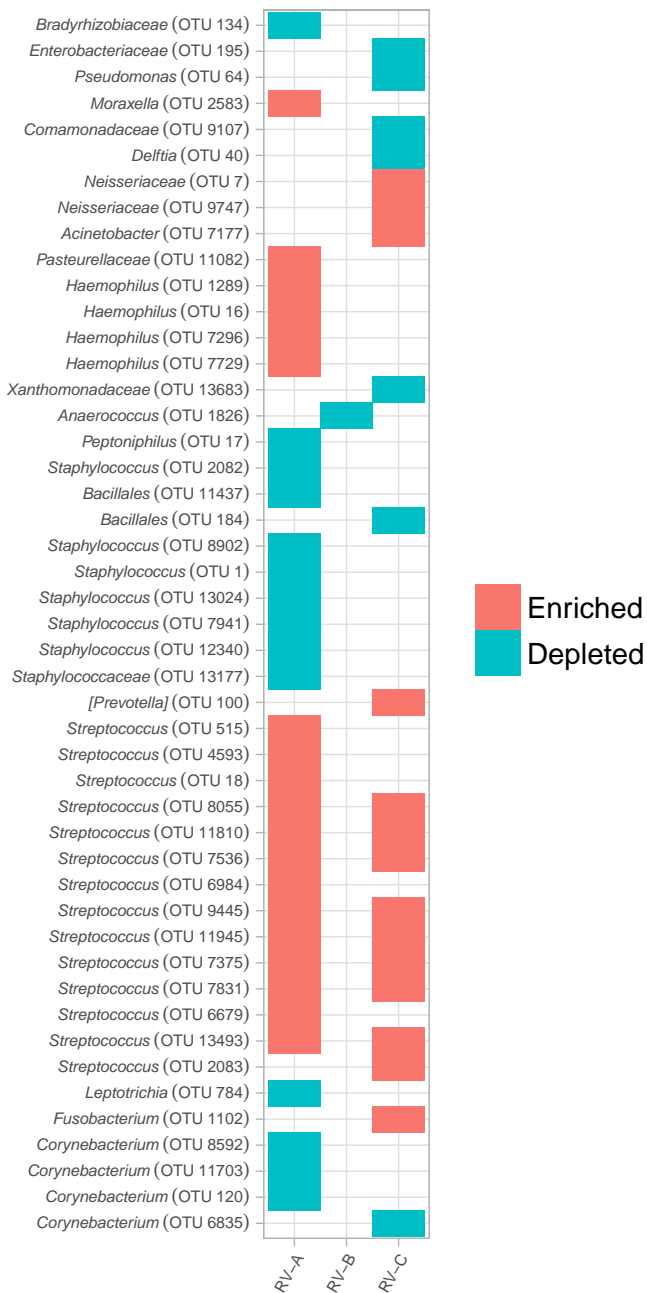

Supplement: NIHMS1052077-supplement-FigureE3.pdf [file NIHMS1052077-supplement-FigureE3.pdf]

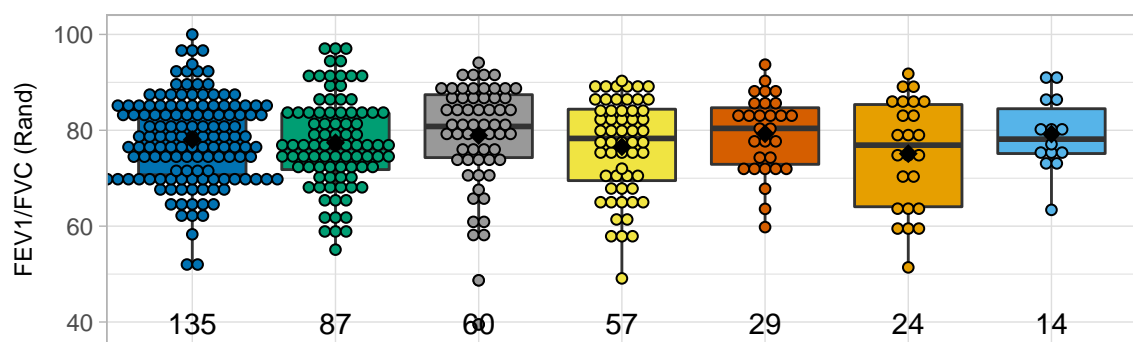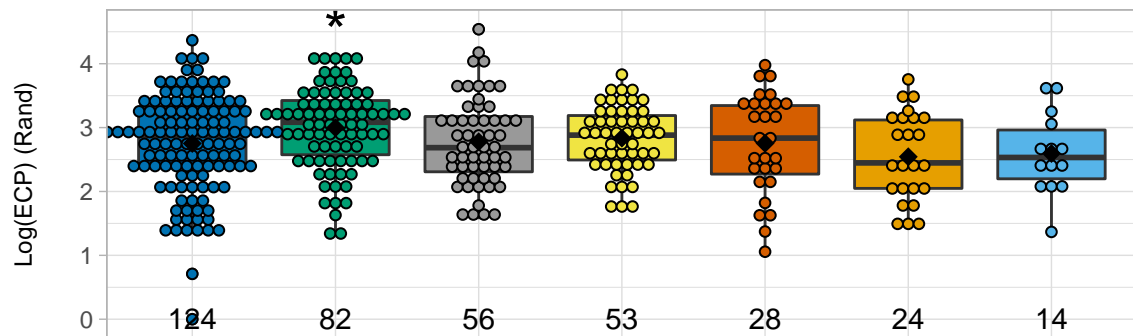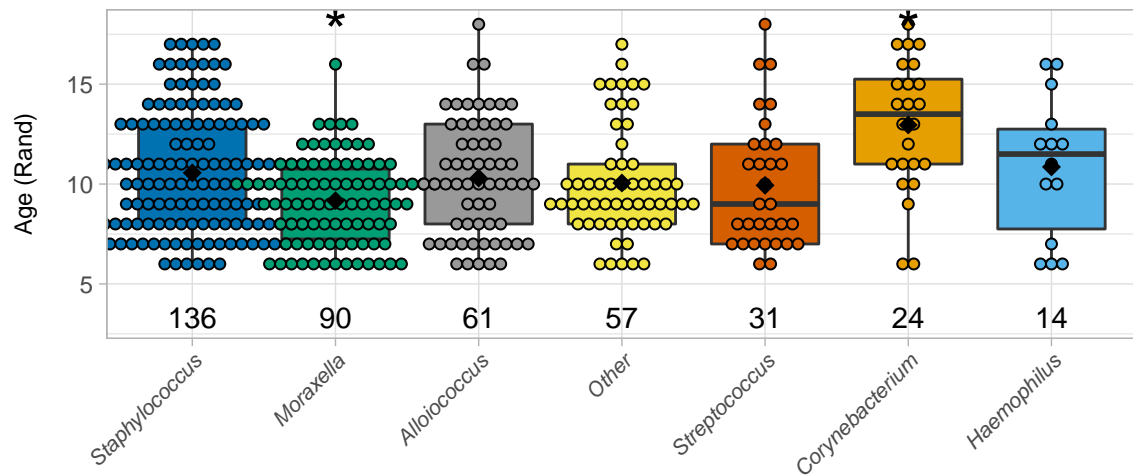

Dominant Taxonomic Group at Baseline

Supplement: NIHMS1052077-supplement-FigureE4.pdf [file NIHMS1052077-supplement-FigureE4.pdf]

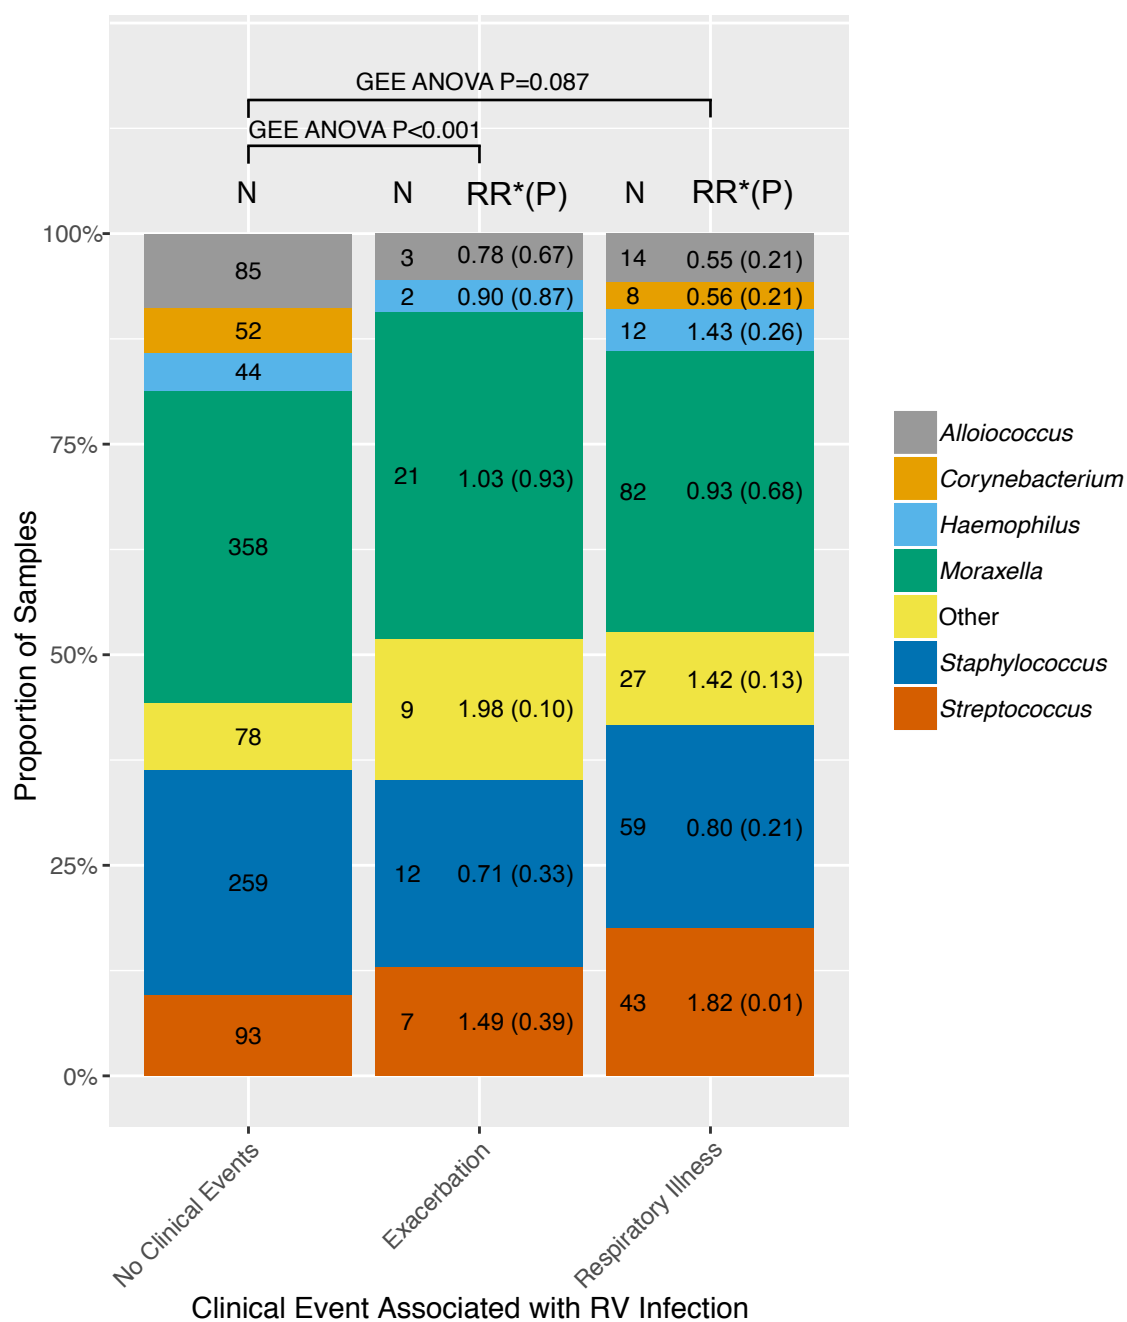

Supplement: NIHMS1052077-supplement-FigureE5.pdf [file NIHMS1052077-supplement-FigureE5.pdf]

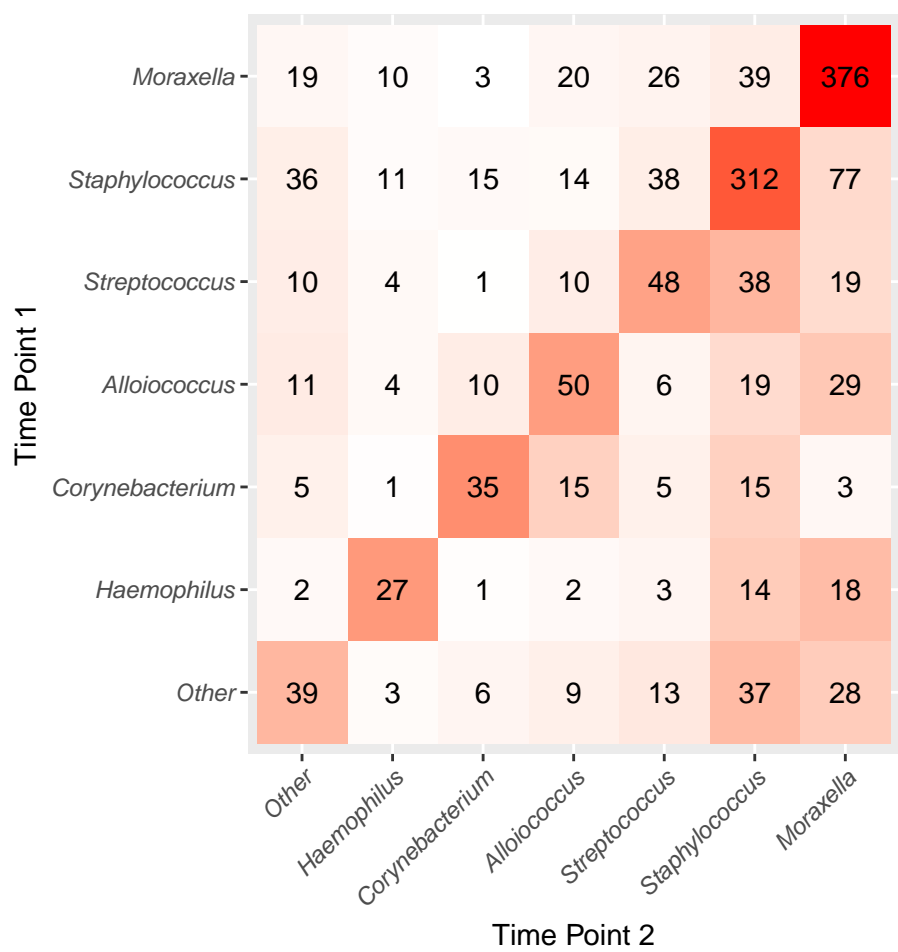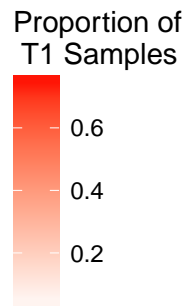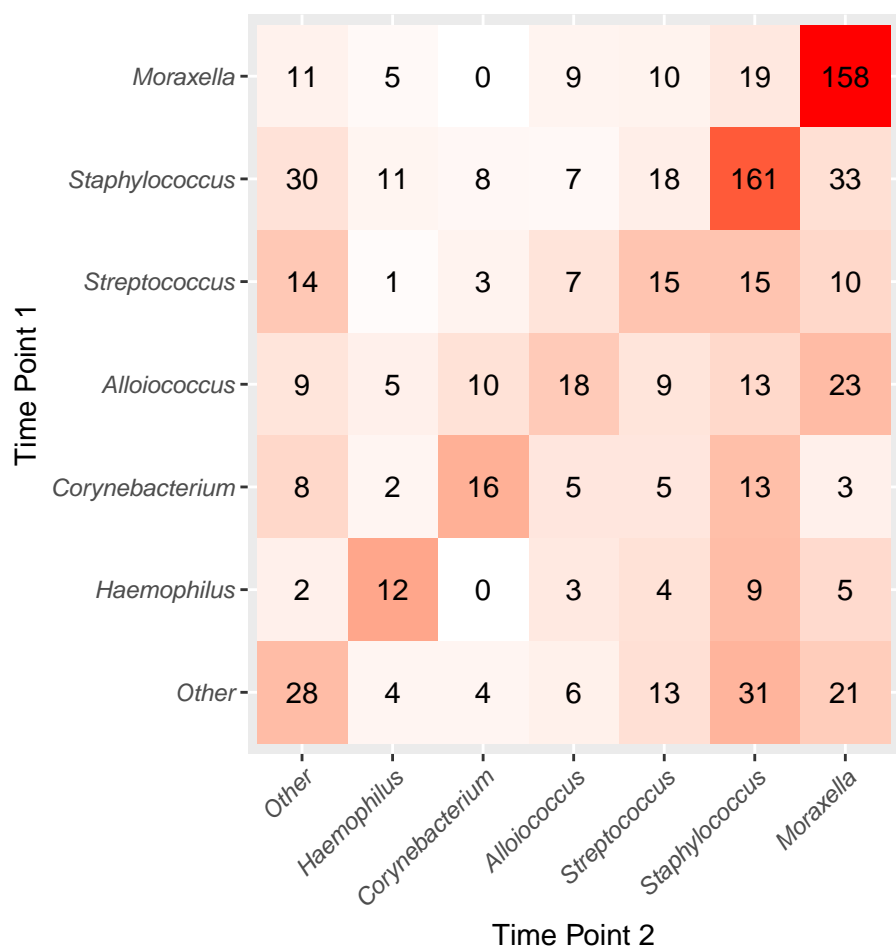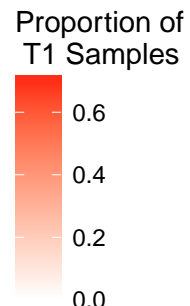

Supplement: NIHMS1052077-supplement-FigureE6.pdf [file NIHMS1052077-supplement-FigureE6.pdf]

**A**

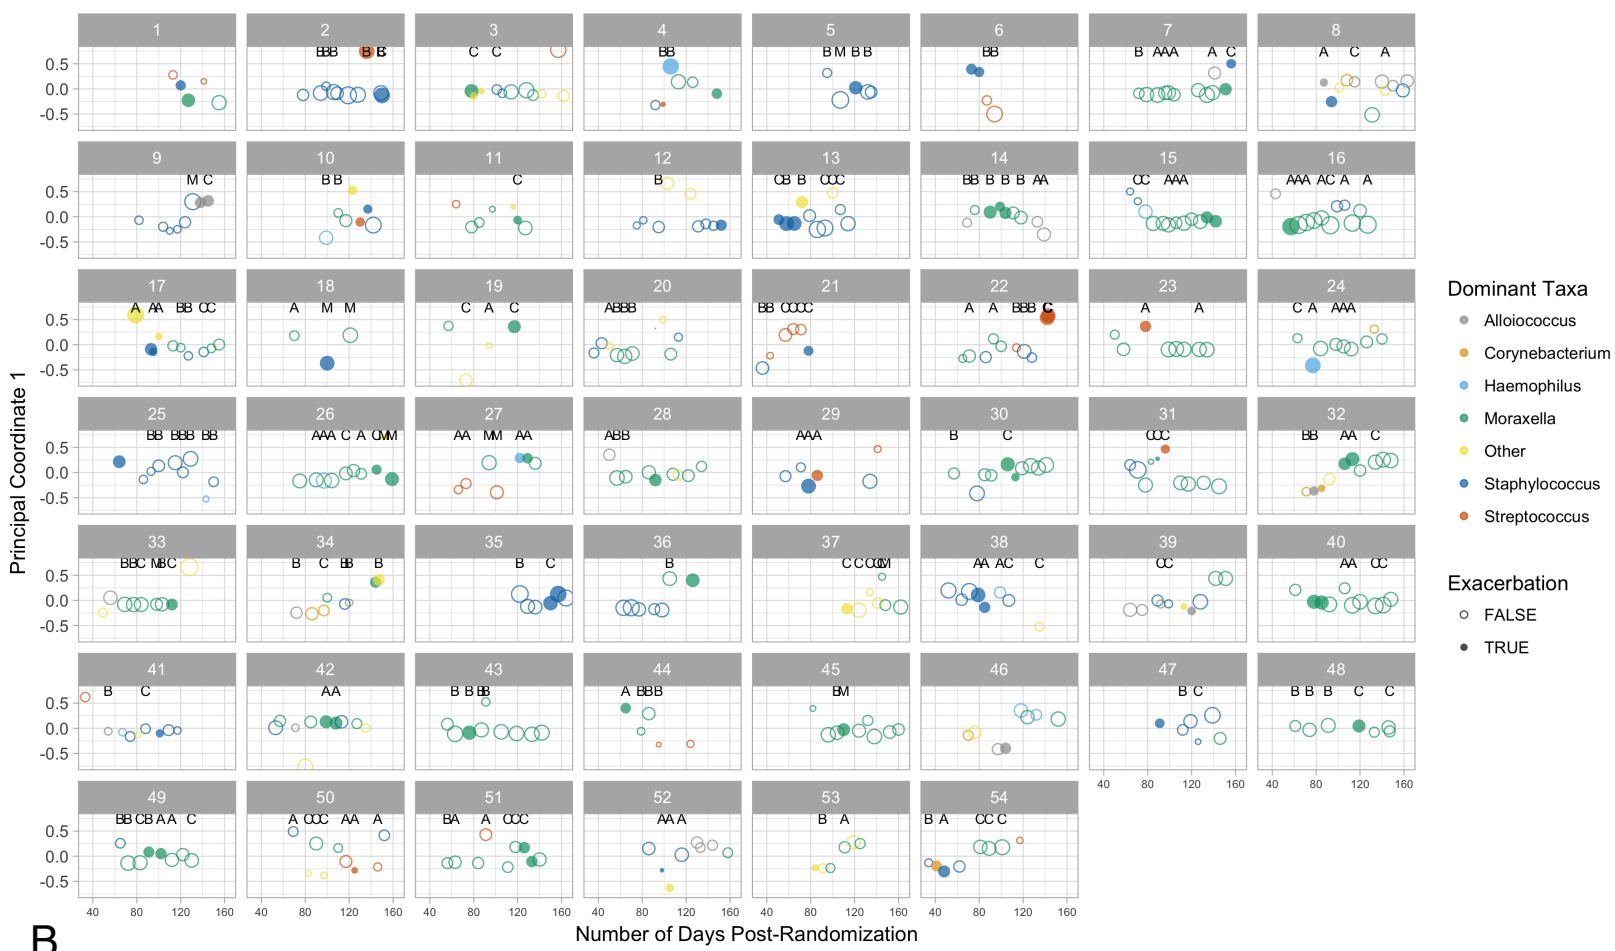

**B**

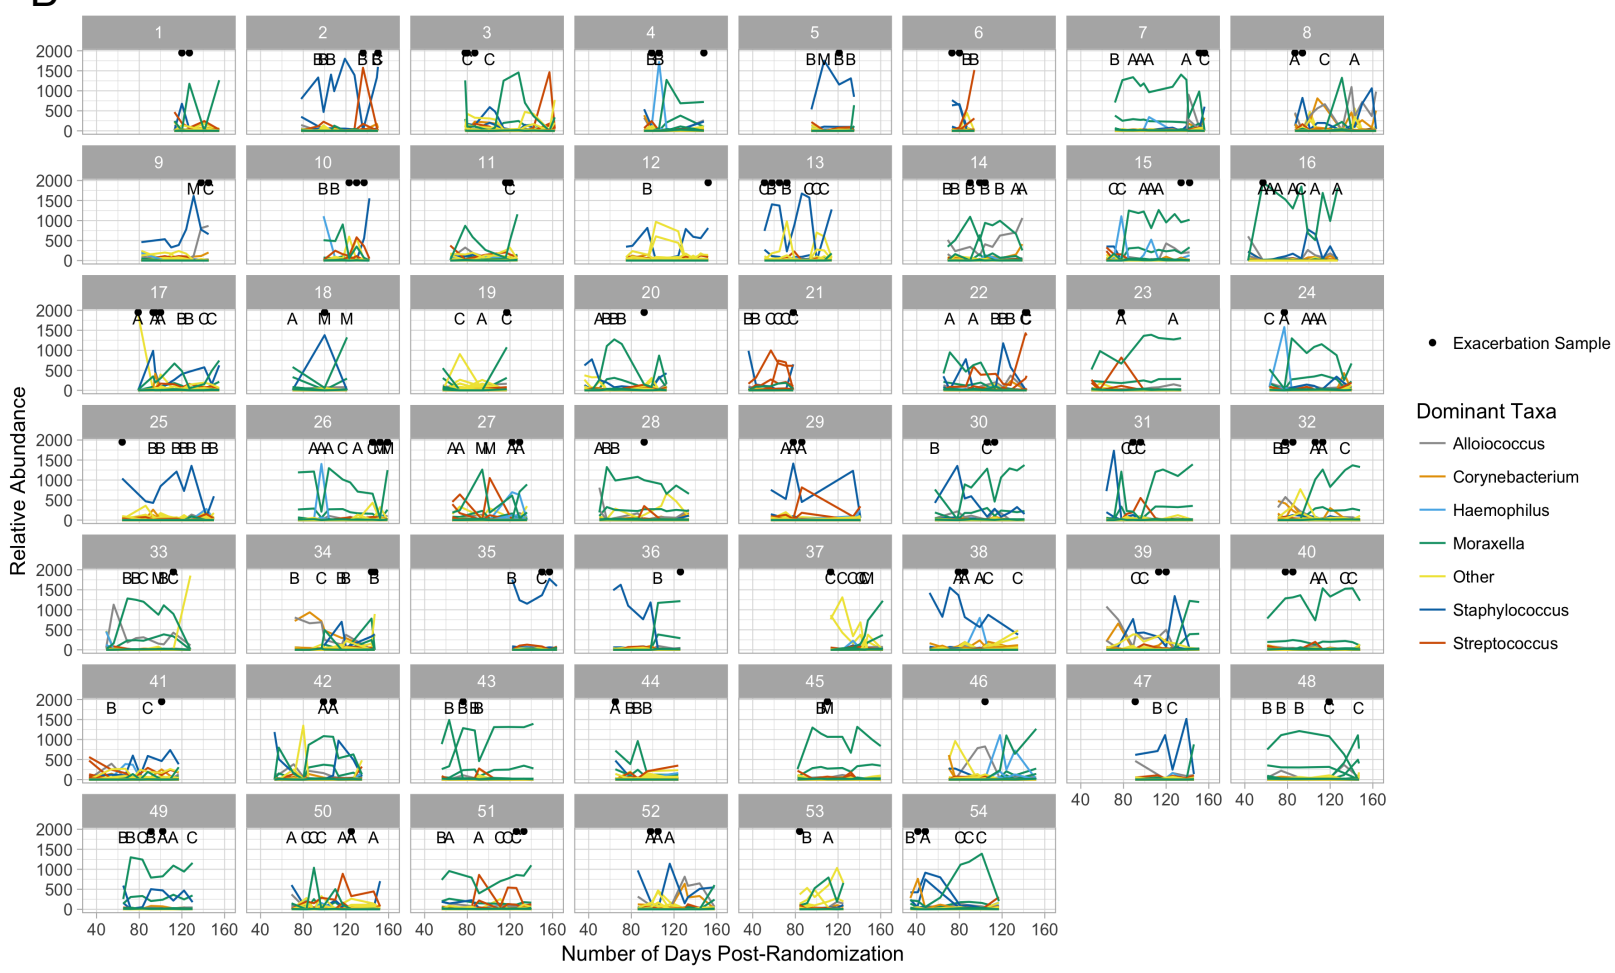

Supplement: NIHMS1052077-supplement-FigureE7.pdf [file NIHMS1052077-supplement-FigureE7.pdf]

Fold Change

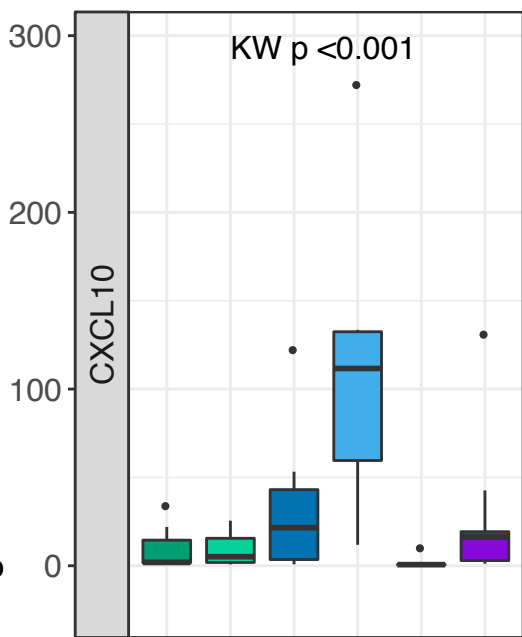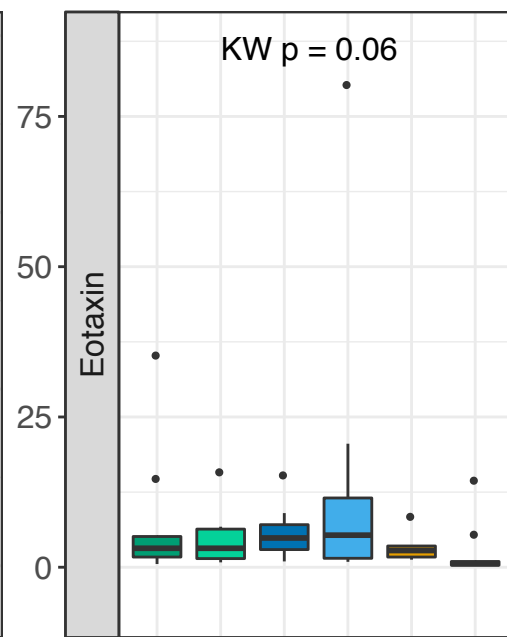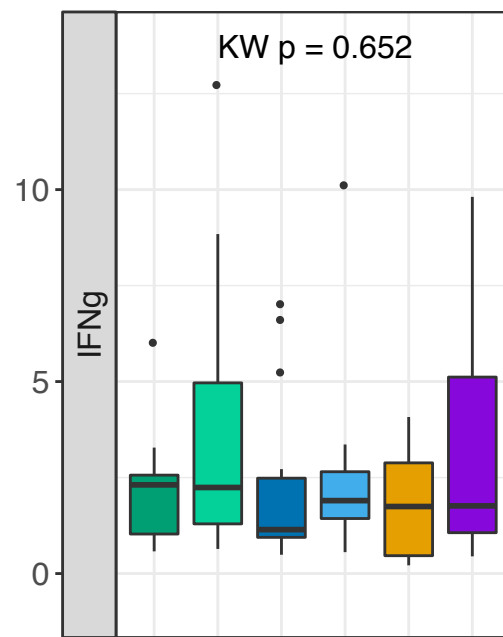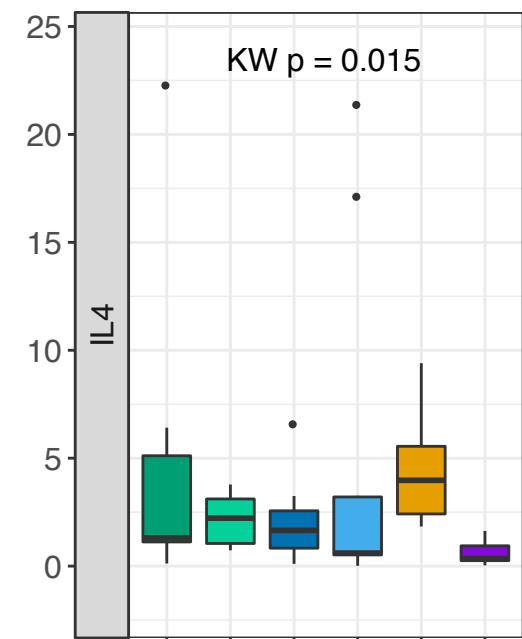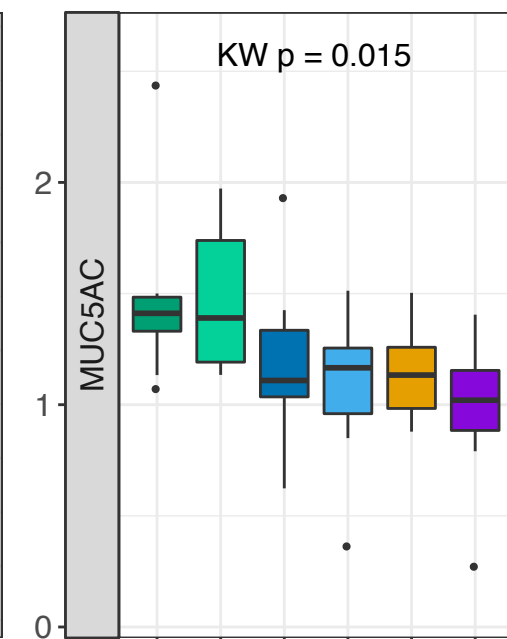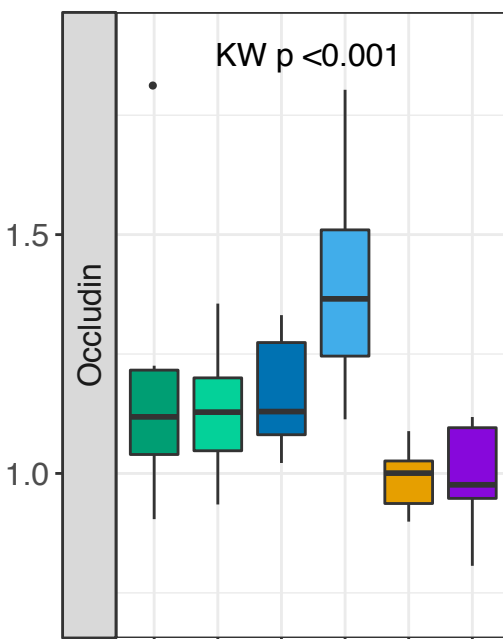

- M. catarrhalis* (P)
- M. catarrhalis* (U)
- S. epidermidis*
- S. aureus*
- C. propinquum*
- L. sakei*

Supplement: NIHMS1052077-supplement-FigureE8.pdf [file NIHMS1052077-supplement-FigureE8.pdf]
